# Supplementary material
Source: PubMed Central journal article supplement (PMC6170522)
Supplement: mmc1.pdf [file mmc1.pdf]

**Biophysical Journal, Volume 115**

**Supplemental Information**

**Confidence Analysis of DEER Data and Its Structural Interpretation with  
Ensemble-Biased Metadynamics**

**Eric J. Hustedt, Fabrizio Marinelli, Richard A. Stein, José D. Faraldo-Gómez, and Hassane  
S. Mchaourab**

## SUPPLEMENTAL TABLES

**Table S1. Model selection for fit in Fig. 4.**

| $n$ | $\chi^2_{\nu}$ | $\Delta BIC$ |
|-----|----------------|--------------|
| 1   | 1.074          | 0.0          |
| 2   | 1.050          | 7.0          |

**Table S2. Best-fit parameters for the simulated DEER signal in Fig 4.**

|                                               | $\Delta$    | $\lambda$       | scale        | $r_0$       | $\sigma_r$ | $\chi^2_{\nu}$ |
|-----------------------------------------------|-------------|-----------------|--------------|-------------|------------|----------------|
| Best-fit values                               | 0.308       | 4.83            | 1.0025       | 32.75       | 2.60       | 1.074          |
| Uncertainties <sup>a</sup>                    | $\pm 0.039$ | $\pm 0.88$      | $\pm 0.0024$ | $\pm 0.57$  | $\pm 1.15$ |                |
| CI lower limit <sup>b</sup>                   | -0.016      | ND <sup>g</sup> | -0.0018      | -0.25       | -0.49      |                |
| CI upper limit <sup>b</sup>                   | +0.018      | +0.26           | +0.0018      | +0.27       | +0.51      |                |
| Average of 10000 best-fit values <sup>c</sup> | 0.300       | 4.92            | 1.0001       | 32.50       | 2.49       | 1.000          |
| 2 $\times$ std. dev. of 10000 best-fit values | 0.023       | 0.67            | 0.0019       | 0.35        | 0.71       | 0.101          |
| Average of 10000 uncertainties <sup>e</sup>   | $\pm 0.031$ | $\pm 1.09$      | $\pm 0.0021$ | $\pm 0.47$  | $\pm 0.93$ |                |
| <b>True values <sup>f</sup></b>               | <b>0.3</b>  | <b>5.0</b>      | <b>1.0</b>   | <b>32.5</b> | <b>2.5</b> |                |

<sup>a</sup>  $2\sigma$  uncertainties estimated using Eqs. 15-17.

<sup>b</sup> Values given correspond to the  $2\sigma$  confidence level.

<sup>c</sup> Average best-fit parameters for 10000 replicate simulated data sets.

<sup>d</sup> Twice the standard deviations of the best-fit parameters for 10000 replicate simulated data sets.

<sup>e</sup> Average of the  $2\sigma$  uncertainties estimated from fits to 10000 replicate simulated data sets.

<sup>f</sup> The true parameters used to generate the simulated data.

<sup>g</sup>  $\chi^2_{\nu}$  does not reach the  $2\sigma$  level for any  $\lambda$  less than the best-fit value

**Table S3. Model selection for fits in Fig. 5.**

|                           | $n$ | $\chi^2_{\nu}$ | $\Delta BIC$ |
|---------------------------|-----|----------------|--------------|
| equal-width components    | 1   | 2.144          | 130.2        |
|                           | 2   | 1.706          | 72.0         |
|                           | 3   | 1.300          | 0.0          |
|                           | 4   | 1.311          | 16.9         |
| variable-width components | 1   | 1.542          | 89.0         |
|                           | 2   | 1.275          | 42.9         |
|                           | 3   | 1.065          | 0.0          |
|                           | 4   | 1.060          | 12.7         |

**Table S4. Best-fit parameters for the simulated multi-component signals in Fig. 5.**

| <b>equal-width components</b>                              | $\Delta$     | $\lambda$   | scale        | $r_{0,1}$   | $\sigma_{r,1}$ | $r_{0,2}$   | $\sigma_{r,2}$ | $a_2(f_2)^g$     | $r_{0,3}$   | $\sigma_{r,3}$ | $a_3(f_3)^g$     | $\chi^2_\nu$ |
|------------------------------------------------------------|--------------|-------------|--------------|-------------|----------------|-------------|----------------|------------------|-------------|----------------|------------------|--------------|
| Best-fit values                                            | 0.3059       | 4.981       | 1.0035       | 25.00       | 2.82           | 34.61       | 1.95           | 0.650<br>(0.274) | 44.67       | 3.51           | 0.579<br>(0.376) | 1.300        |
| Uncertainties <sup>a</sup>                                 | $\pm 0.0038$ | $\pm 0.013$ | $\pm 0.0036$ | $\pm 0.41$  | $\pm 0.53$     | $\pm 0.31$  | $\pm 0.43$     | $\pm 0.026$      | $\pm 0.38$  | $\pm 0.70$     | $\pm 0.058$      |              |
| CI lower limit <sup>b</sup>                                | -0.0037      | -0.014      | -0.0035      | -0.41       | -0.50          | -0.32       | -0.40          | -0.029           | -0.43       | -0.65          | -0.055           |              |
| CI upper limit <sup>b</sup>                                | 0.0039       | 0.013       | 0.0037       | 0.43        | 0.60           | 0.31        | 0.48           | 0.026            | 0.35        | 0.75           | 0.063            |              |
| Average of 10000 best-fit values <sup>c</sup>              | 0.3001       | 4.999       | 1.0000       | 25.01       | 2.50           | 34.99       | 2.49           | 0.666<br>(0.331) | 44.98       | 2.53           | 0.503<br>(0.335) | 1.000        |
| 2 $\times$ std. dev. of 10000 best-fit values <sup>d</sup> | 0.0040       | 0.014       | 0.0039       | 0.48        | 0.59           | 0.40        | 0.63           | 0.032            | 0.33        | 0.76           | 0.063            | 0.104        |
| Average of 10000 uncertainties <sup>e</sup>                | $\pm 0.0040$ | $\pm 0.014$ | $\pm 0.0039$ | $\pm 0.47$  | $\pm 0.58$     | $\pm 0.41$  | $\pm 0.62$     | $\pm 0.032$      | $\pm 0.34$  | $\pm 0.76$     | $\pm 0.062$      |              |
| <b>True values<sup>f</sup></b>                             | <b>0.3</b>   | <b>5.0</b>  | <b>1.0</b>   | <b>25.0</b> | <b>2.5</b>     | <b>35.0</b> | <b>2.5</b>     | <b>0.667</b>     | <b>45.0</b> | <b>2.5</b>     | <b>0.5</b>       |              |
| <b>variable-width components</b>                           | $\Delta$     | $\lambda$   | scale        | $r_{0,1}$   | $\sigma_{r,1}$ | $r_{0,2}$   | $\sigma_{r,2}$ | $a_2(f_2)^g$     | $r_{0,3}$   | $\sigma_{r,3}$ | $a_3(f_3)^g$     | $\chi^2_\nu$ |
| Best-fit values                                            | 0.3013       | 4.985       | 1.0041       | 45.07       | 7.70           | 32.74       | 2.31           | 0.479<br>(0.224) | 22.87       | 1.70           | 0.533<br>(0.255) | 1.064        |
| Uncertainties <sup>a</sup>                                 | $\pm 0.0117$ | $\pm 0.044$ | $\pm 0.0039$ | $\pm 2.06$  | $\pm 2.93$     | $\pm 0.54$  | $\pm 0.77$     | $\pm 0.134$      | $\pm 0.38$  | $\pm 0.46$     | $\pm 0.115$      |              |
| CI lower limit <sup>b</sup>                                | -0.0094      | -0.043      | -0.0038      | -2.21       | -2.17          | -0.55       | -0.63          | -0.133           | -0.39       | -0.39          | -0.087           |              |
| CI upper limit <sup>b</sup>                                | 0.0117       | 0.035       | 0.0039       | 1.37        | 2.71           | 0.53        | 0.73           | 0.093            | 0.38        | 0.48           | 0.099            |              |
| Average of 10000 best-fit values <sup>c</sup>              | 0.3002       | 5.000       | 1.0002       | 44.83       | 7.55           | 32.57       | 2.44           | 0.493<br>(0.245) | 22.49       | 1.47           | 0.504<br>(0.255) | 1.000        |
| 2 $\times$ std. dev. of 10000 best-fit values <sup>d</sup> | 0.0119       | 0.042       | 0.0041       | 2.36        | 3.06           | 0.62        | 0.88           | 0.145            | 0.38        | 0.45           | 0.112            | 0.104        |
| Average of 10000 uncertainties <sup>e</sup>                | $\pm 0.0116$ | $\pm 0.041$ | $\pm 0.0041$ | $\pm 2.17$  | $\pm 2.96$     | $\pm 0.62$  | $\pm 0.82$     | $\pm 0.136$      | $\pm 0.37$  | $\pm 0.45$     | $\pm 0.107$      |              |
| <b>True values<sup>f</sup></b>                             | <b>0.3</b>   | <b>5.0</b>  | <b>1.0</b>   | <b>45.0</b> | <b>7.5</b>     | <b>32.5</b> | <b>2.5</b>     | <b>0.500</b>     | <b>22.5</b> | <b>1.5</b>     | <b>0.5</b>       |              |

<sup>a</sup>  $2\sigma$  uncertainties estimated using Eqs. 15-17.

<sup>b</sup> Upper and lower parameter bounds determined from confidence intervals. Values given correspond to the  $2\sigma$  confidence level.

<sup>c</sup> Average best-fit parameters for 10000 replicate simulated data sets.

<sup>d</sup> Twice the standard deviations of the best-fit parameters for 10000 replicate simulated data sets.

<sup>e</sup> Average of the  $2\sigma$  uncertainties estimated from fits to 10000 replicate simulated data sets.

<sup>f</sup> The true parameters used to simulate data.

<sup>g</sup> The  $f$  values are calculated for the best-fit  $a$  values from Eqs 9-10.

**Table S5. Effect of  $r_0$  on uncertainty in  $P(R)$  parameters.** 500 replicate data sets were generated for a unimodal Gaussian distance distribution with the given true  $r_0$  and  $\sigma_r$  values. Data were calculated for  $t = -128$  to 2400 ns with a time increment of 8 ns.  $\Delta = 0.3$  and  $\lambda = 5$ . The standard deviations were determined from the 500 best-fit  $r_0$  and  $\sigma_r$  values. Modulation corresponding to  $r_0 = 50 \text{ \AA}$  will have a period of 2400 ns.

| True <sup>a</sup> |            | Standard Deviation <sup>b</sup> |            |
|-------------------|------------|---------------------------------|------------|
| $r_0$             | $\sigma_r$ | $r_0$                           | $\sigma_r$ |
| 25                | 2.5        | 0.05                            | 0.07       |
| 25                | 5.0        | 0.09                            | 0.11       |
| 35                | 2.5        | 0.04                            | 0.05       |
| 35                | 5.0        | 0.06                            | 0.09       |
| 45                | 2.5        | 0.03                            | 0.07       |
| 45                | 5.0        | 0.06                            | 0.12       |
| 55                | 2.5        | 0.20                            | 0.62       |
| 55                | 5.0        | 0.49                            | 0.94       |
| 65                | 2.5        | 0.42                            | 1.51       |
| 65                | 5.0        | 0.58                            | 1.26       |

<sup>a</sup>The true parameters used to simulate the data.

<sup>b</sup>The standard deviations of the best-fit parameters from fits to 500 replicate simulated data sets.

**Table S6. Best-fit parameters for the T4L DEER signals in Fig. 8.**

| label positions | $\Delta$ | $\lambda$ | scale  | $r_{0,1}$ | $\sigma_{r,1}$ | $r_{0,2}$ | $\sigma_{r,2}$ | $a_2(f_2)$ <sup>a</sup> | $r_{0,3}$ | $\sigma_{r,3}$ | $a_3(f_3)$ <sup>a</sup> |
|-----------------|----------|-----------|--------|-----------|----------------|-----------|----------------|-------------------------|-----------|----------------|-------------------------|
| 62/109          | 0.2589   | 5.0640    | 1.0017 | 29.04     | 1.58           | 25.7      | 1.2            | 0.19<br>(0.06)          | 34.95     | 1.05           | 0.66<br>(0.13)          |
| 62/134          | 0.1343   | 4.8429    | 1.0026 | 40.74     | 0.88           | 44.48     | 0.51           | 0.125<br>(0.125)        | n/a       | n/a            | n/a                     |
| 109/134         | 0.1928   | 4.8569    | 1.0030 | 30.6      | 5.8            | 30.76     | 1.41           | 0.787<br>(0.787)        | n/a       | n/a            | n/a                     |

<sup>a</sup>The  $f$  values are calculated for the best-fit  $a$  values from Eqs 9-10.

**Table S7. Modulation depth and background parameters for the calculated DEER signals reported in Fig. 10.** These values were calculated by fitting the theoretical DEER signal (Eqs. 2-6) to the experimental data using a gradient-minimization approach.

| label positions | $\Delta_{MD}$ | $\lambda_{MD}$ | $\Delta_{EBMetaD}$ | $\lambda_{EBMetaD}$ |
|-----------------|---------------|----------------|--------------------|---------------------|
| 62/109          | 0.256         | 5.0716         | 0.257              | 5.0673              |
| 62/134          | 0.131         | 4.8529         | 0.133              | 4.8417              |

**Table S8. Best-fits to the T4L DEER signals in Fig. 8 using alternate basis functions with non-Gaussian shapes.**

| label positions | $n$ | Shape    | Modes <sup>a</sup> | $q$ | $\chi^2_{\nu}$ | $\Delta BIC$ |
|-----------------|-----|----------|--------------------|-----|----------------|--------------|
| 62/109          | 2   | SND      | 2                  | 10  | 0.657          | 0.0          |
| 62/109          | 3   | Gaussian | 2                  | 11  | 0.662          | 6.2          |
| 62/109          | 2   | GSND     | 2                  | 12  | 0.654          | 7.7          |
| 62/109          | 2   | GND      | 2                  | 10  | 0.691          | 11.8         |
|                 |     |          |                    |     |                |              |
| 62/134          | 1   | SND      | 1                  | 6   | 1.216          | 0.0          |
| 62/134          | 1   | GSND     | 1                  | 7   | 1.219          | 4.5          |
| 62/134          | 2   | Gaussian | 2                  | 8   | 1.219          | 8.6          |
| 62/134          | 1   | GND      | 1                  | 6   | 1.343          | 15.9         |
|                 |     |          |                    |     |                |              |
| 109/134         | 1   | GND      | 1                  | 6   | 1.107          | 0.0          |
| 109/134         | 2   | Gaussian | 1                  | 8   | 1.049          | 0.7          |
| 109/134         | 1   | GSND     | 1                  | 7   | 1.099          | 2.9          |
| 109/134         | 1   | SND      | 1                  | 6   | 1.387          | 29.1         |

<sup>a</sup> The number of distinct local maxima in  $P(R)$ .

## SUPPLEMENTAL FIGURES

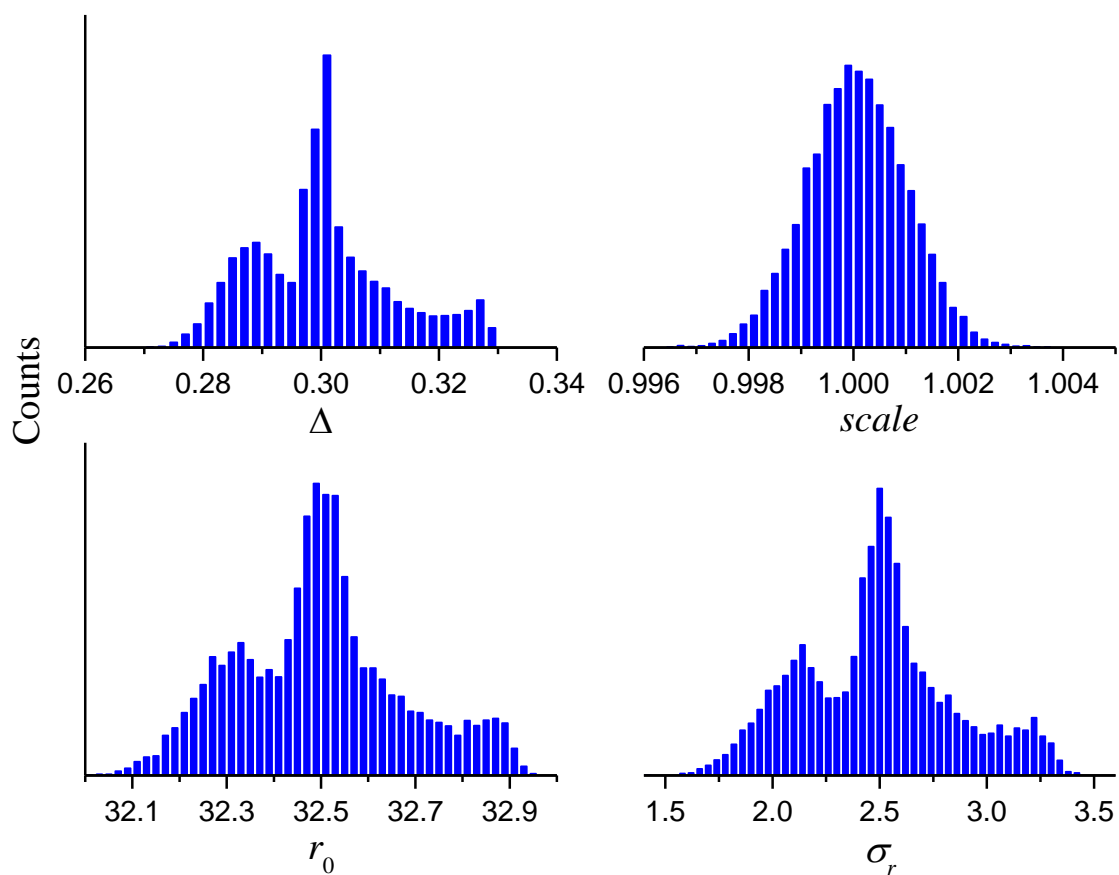

**Figure S1. Histograms for each of the fit parameters from analysis of 10000 replicates of the simulated DEER signal in Fig. 4A. The corresponding histogram for the background parameter  $\lambda$  is shown in Fig. 4C.**

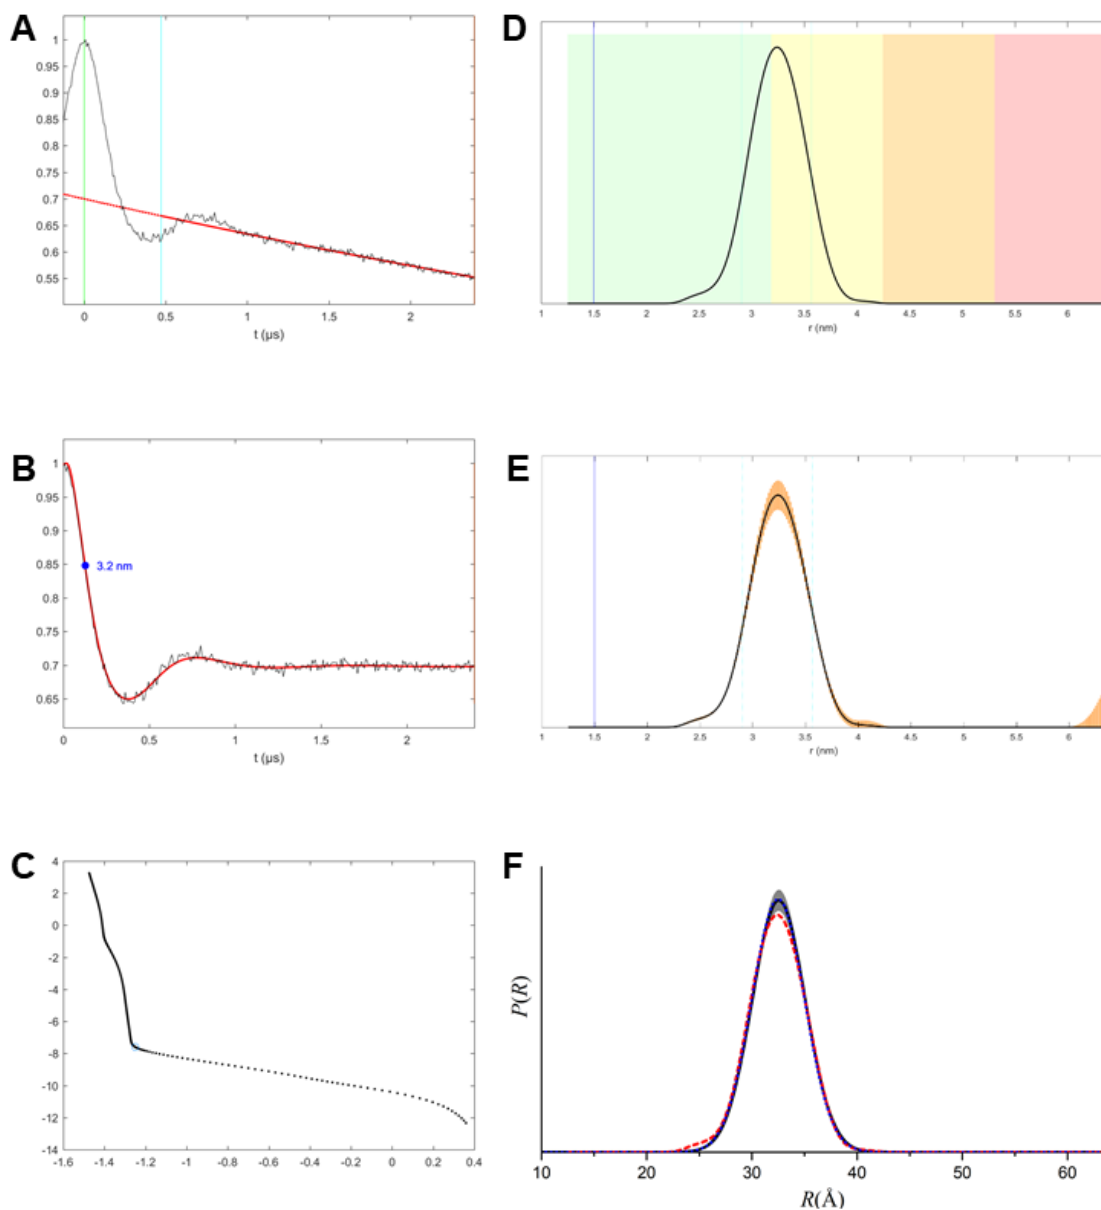

**Figure S2. Fitting of the simulated signal in Fig. 1 (*noise* = 0.005) with DeerAnalysis2016.**

A) Scaled data (black line) with estimate background correction (red line). B) Background corrected data (black line) with initial fit (red line). C) L curve for determining regularization parameter. D) Initial distance distribution (black line) with color-coded reliability regions. E) Mean distance distribution (black line) and error bounds (orange lines) after using validation tool to vary the range of data used to estimate background correction. F) Comparison of mean distance distribution in E (dashed red line) to results from DD in main text (black line with shaded grey region indicating  $2\sigma$  confidence band).

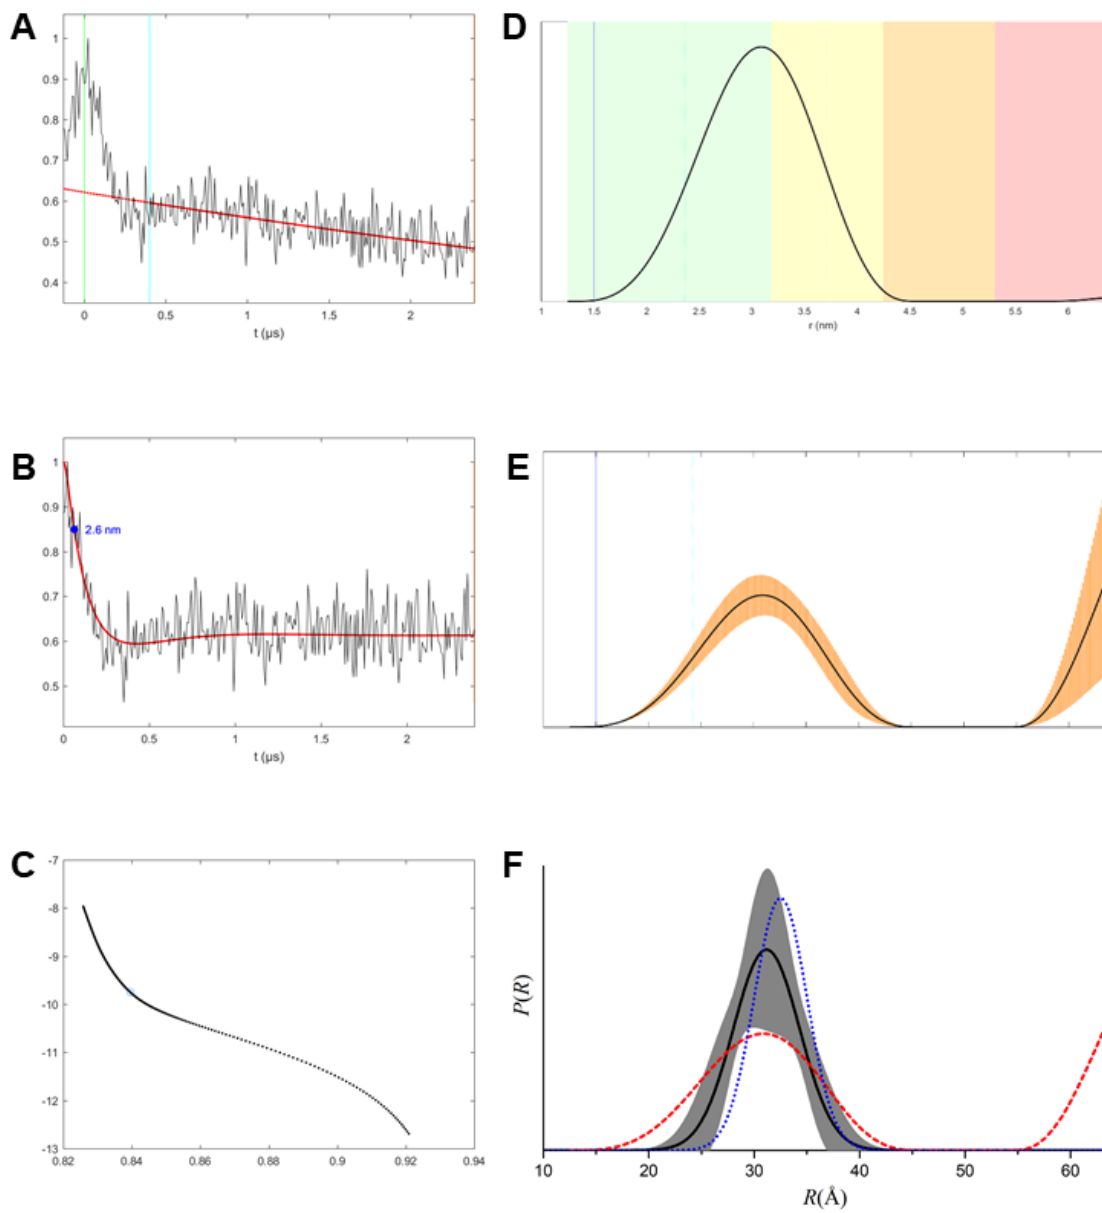

**Figure S3. Fitting of the simulated signal in Fig. 1 (*noise* = 0.05) with DeerAnalysis2016.**  
 Panel descriptions as in Fig. S2.



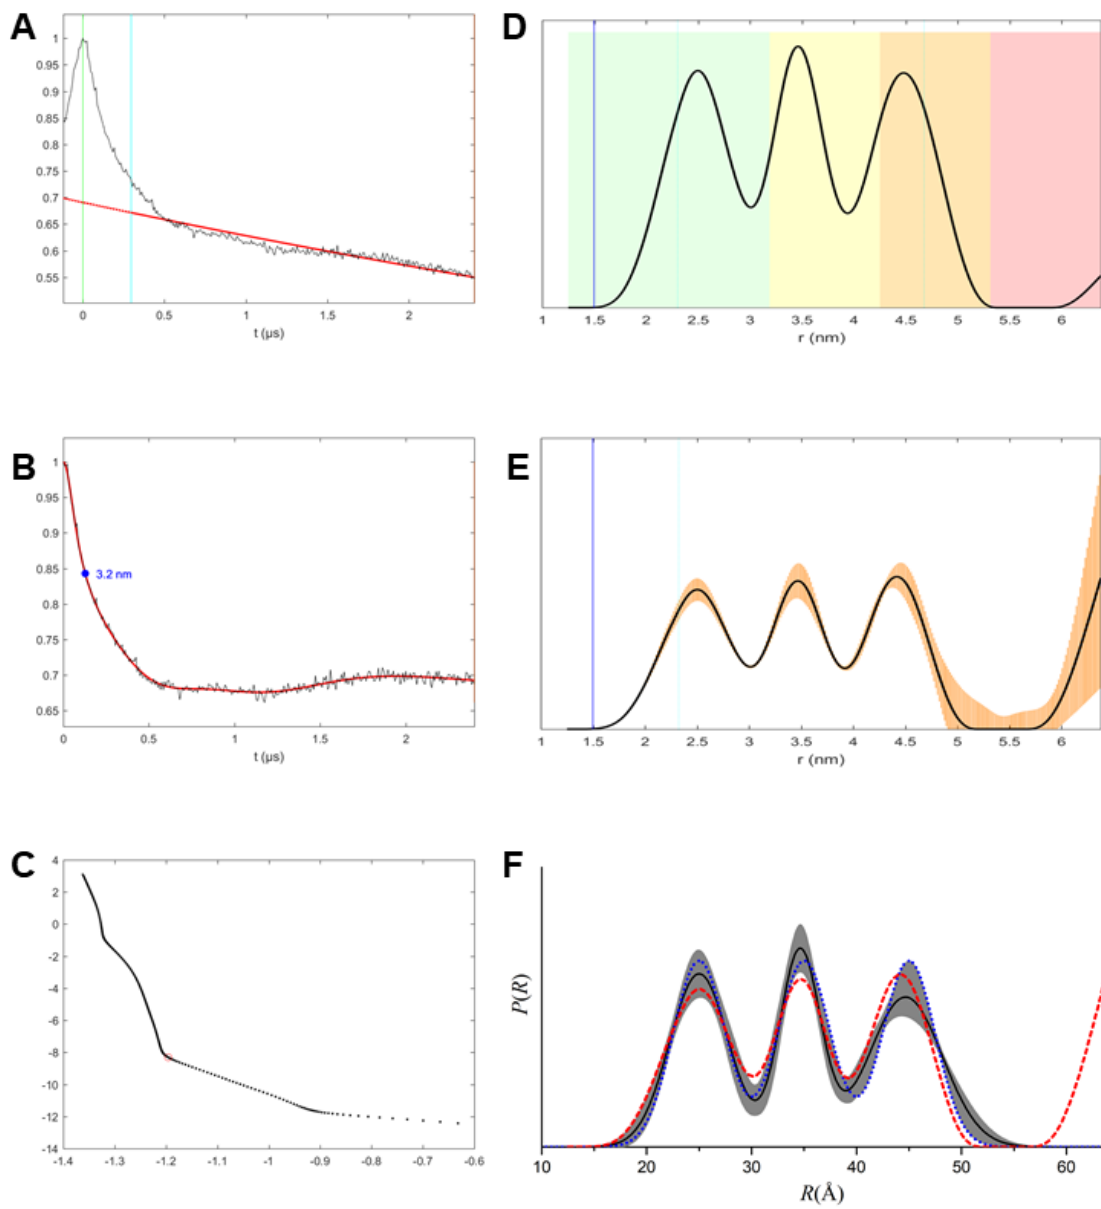

**Figure S4. Fitting of the simulated multi-component signal in Fig. 5 (equal-width components) with DeerAnalysis2016. Panel descriptions as in Fig. S2.**

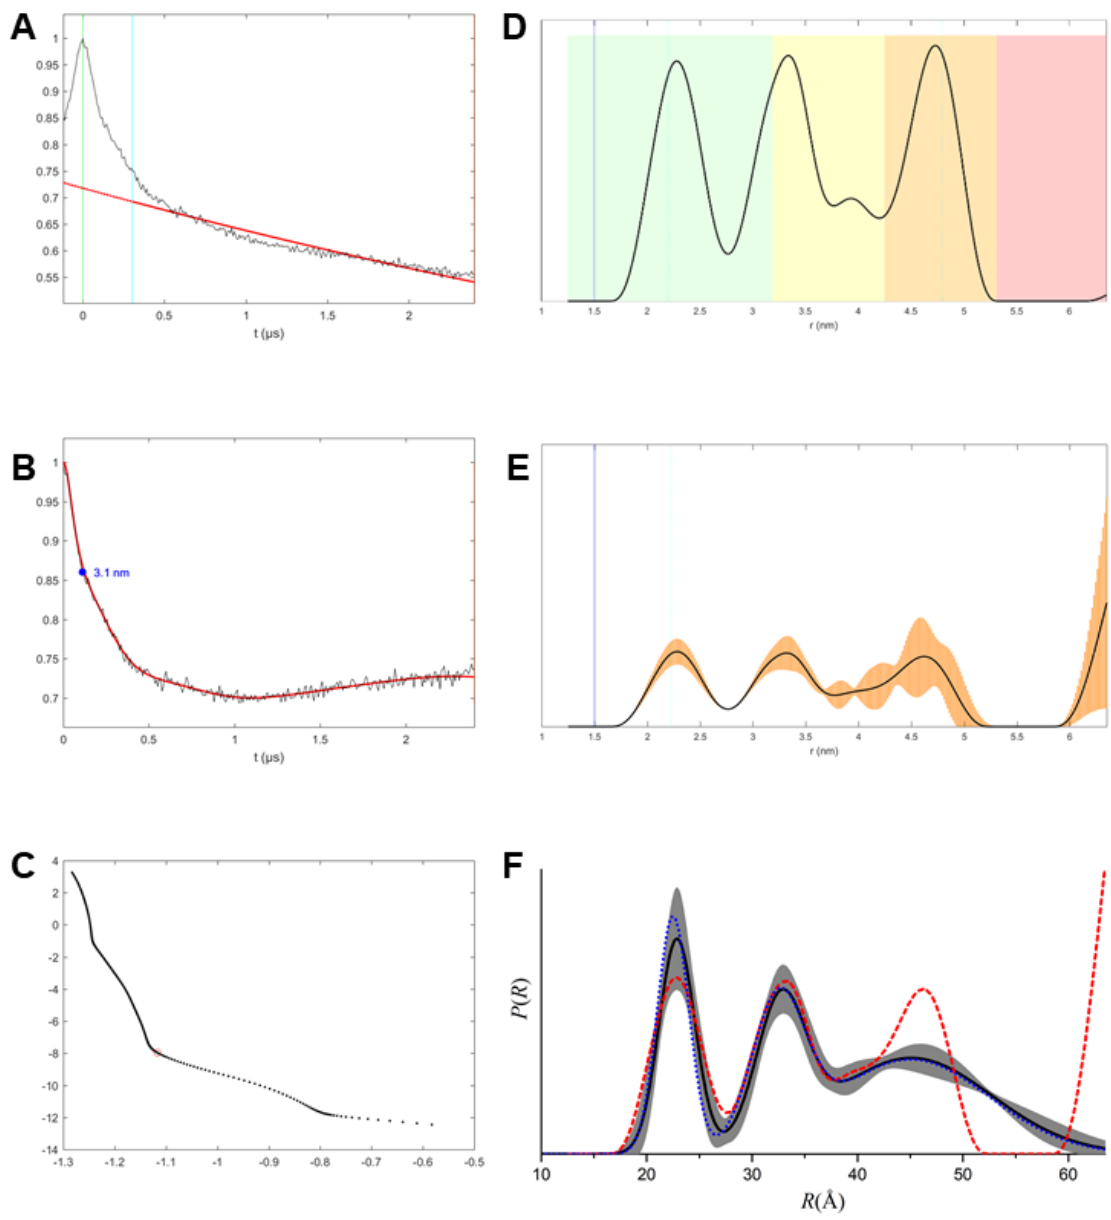

**Figure S5. Fitting of the simulated multi-component signal in Fig. 5 (variable-width components) with DeerAnalysis2016. Panel descriptions as in Fig. S2.**

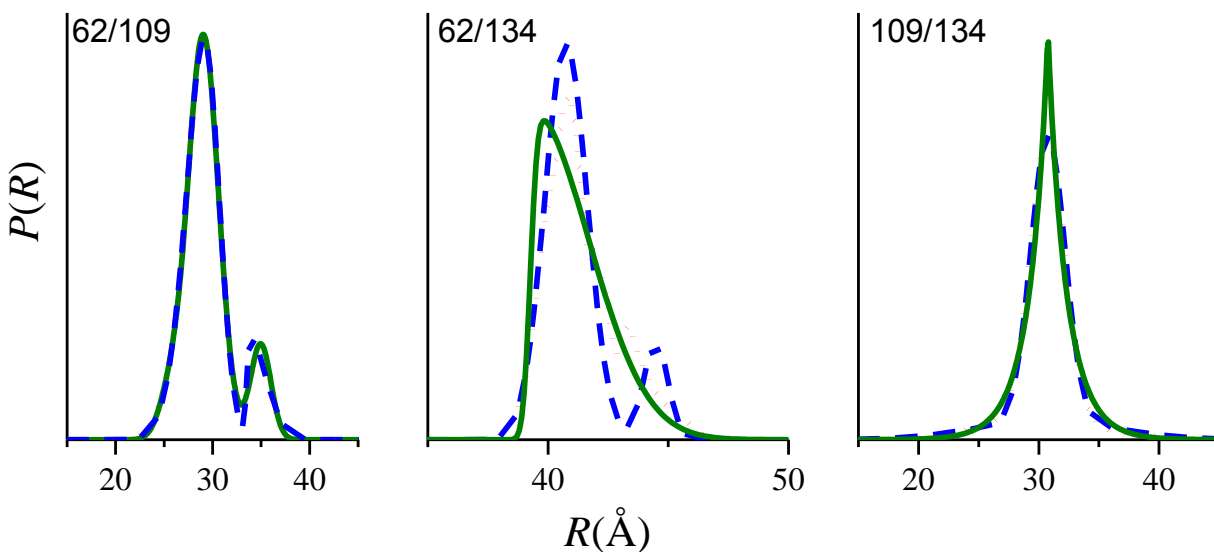

**Figure S6. Best-fit distance distributions for theT4L DEER signals in Fig. 8 using alternate basis functions with non-Gaussian shapes.** The  $P(R)$  for the optimal non-Gaussian models ( $\Delta BIC = 0$  in Table S8) are shown as solid green lines. For comparison, the optimal Gaussian models from Fig. 8 are shown as dashed blue lines and the  $P(R)$  from the EBMetaD calculations including confidence bands from Fig. 9B are shown as dotted red lines.

## SUPPLEMENTAL METHODS

Fitting can be performed with non-Gaussian basis functions in place of the Gaussian functions of Eq. 11. Here, we have considered the following alternative basis functions.

Generalized Normal Distribution (GND) with non-zero excess kurtosis (1)

$$p_j(R) = \frac{\beta_j}{2Q\sigma_{rj}\Gamma(1/\beta_j)} e^{-\left(\frac{|R-r_{0j}|}{Q\sigma_{rj}}\right)^{\beta_j}} \quad [S1]$$

$$Q = \sqrt{\frac{\Gamma(1/\beta_j)}{\Gamma(1/\beta_j)}}$$

where  $\Gamma$  is the Gamma function

$$\Gamma(z) = \int_0^{\infty} x^{z-1} e^{-x} dx$$

The shape of each component is controlled by the additional parameter  $\beta_j$ .

Skew Normal Distribution (SND) with non-zero skew (2)

$$p_j(R) = \frac{1}{\sqrt{2\pi}\sigma_{rj}} e^{-\frac{(R-r_{0j})^2}{2\sigma_{rj}^2}} \left[1 + \operatorname{erf}\left(\frac{Z}{\sqrt{2}}\right)\right] \quad [S2]$$

$$Z = \zeta_j \frac{R - r_{0j}}{\sigma_{rj}}$$

where erf is the error function

$$\operatorname{erf}(x) = \frac{2}{\sqrt{\pi}} \int_0^x e^{-t^2} dt$$

The shape of each component is controlled by the additional parameter  $\zeta_j$ .

Generalized Skew Normal Distribution (GSND) with non-zero excess kurtosis and skew

$$p_j(R) = \frac{\beta_j}{2Q\sigma_{rj}\Gamma(1/\beta_j)} e^{-\left(\frac{|R-r_{0j}|}{Q\sigma_{rj}}\right)^{\beta_j}} \left[1 + \operatorname{erf}\left(\frac{Z}{\sqrt{2}}\right)\right] \quad [\text{S3}]$$

The shape of each component is controlled by the additional parameters  $\beta_j$  and  $\zeta_j$ .

#### **SUPPLEMENTAL REFERENCES**

1. Nadarajah, S. 2005. A Generalized Normal Distribution. *J. Appl. Stat.* 32:685-694.
2. Azzalini, A. 1985. A Class of Distributions which Includes the Normal Ones. *Scand. J. Stat.* 12:171-178.
